# Supplementary material
Source: publisher figshare collection journal article supplement (https://sage.figshare.com/ndownloader/files/14530337)
Supplement: Supplementary file 1 [file 14530337]

## Supplementary files – Development of themes

These diagrams demonstrate the development the themes derived directly from the participants own words, these have been grouped and the six superordinate themes identified.

These diagrams give an overview of the depth of data and the way in which it was ordered.

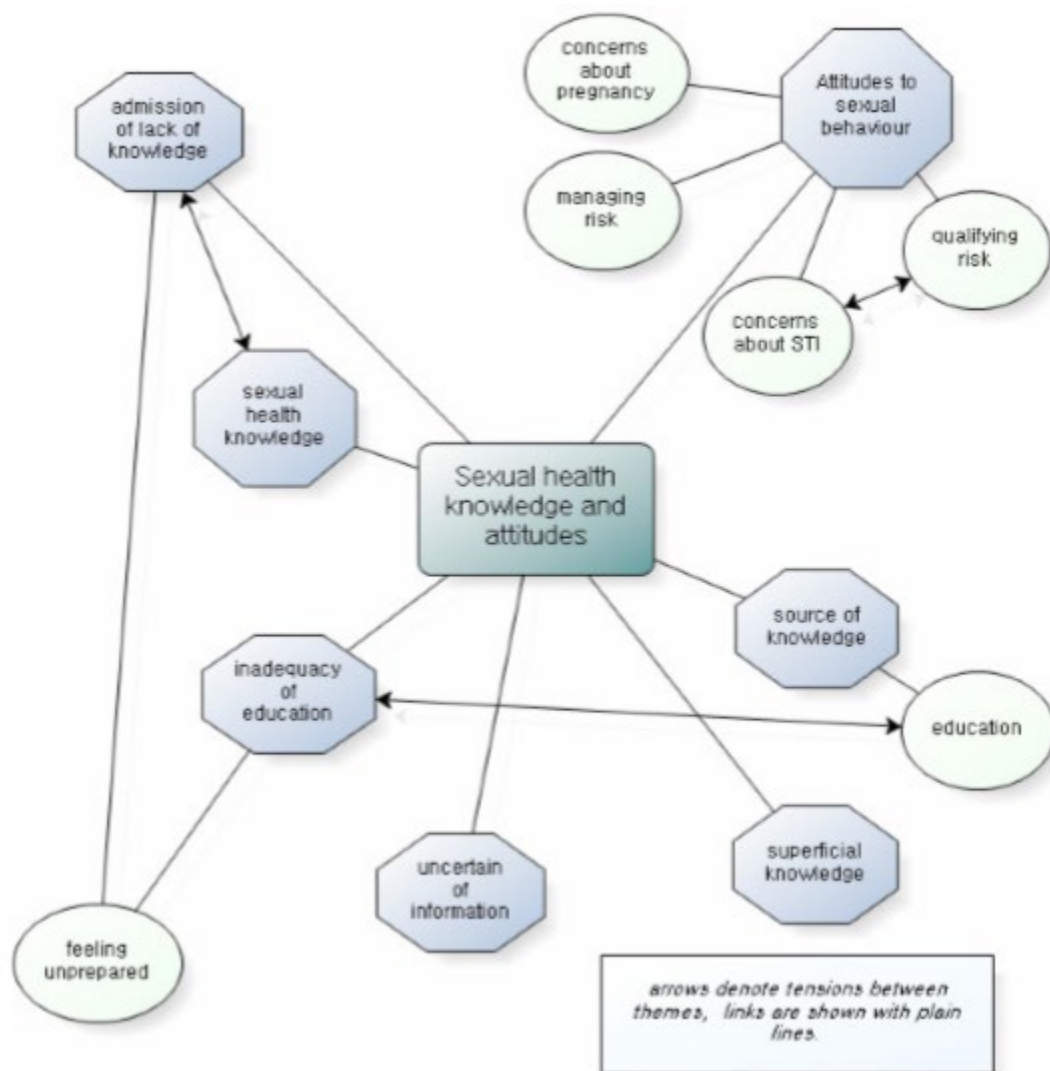

Figure one: Sexual health knowledge and attitudes

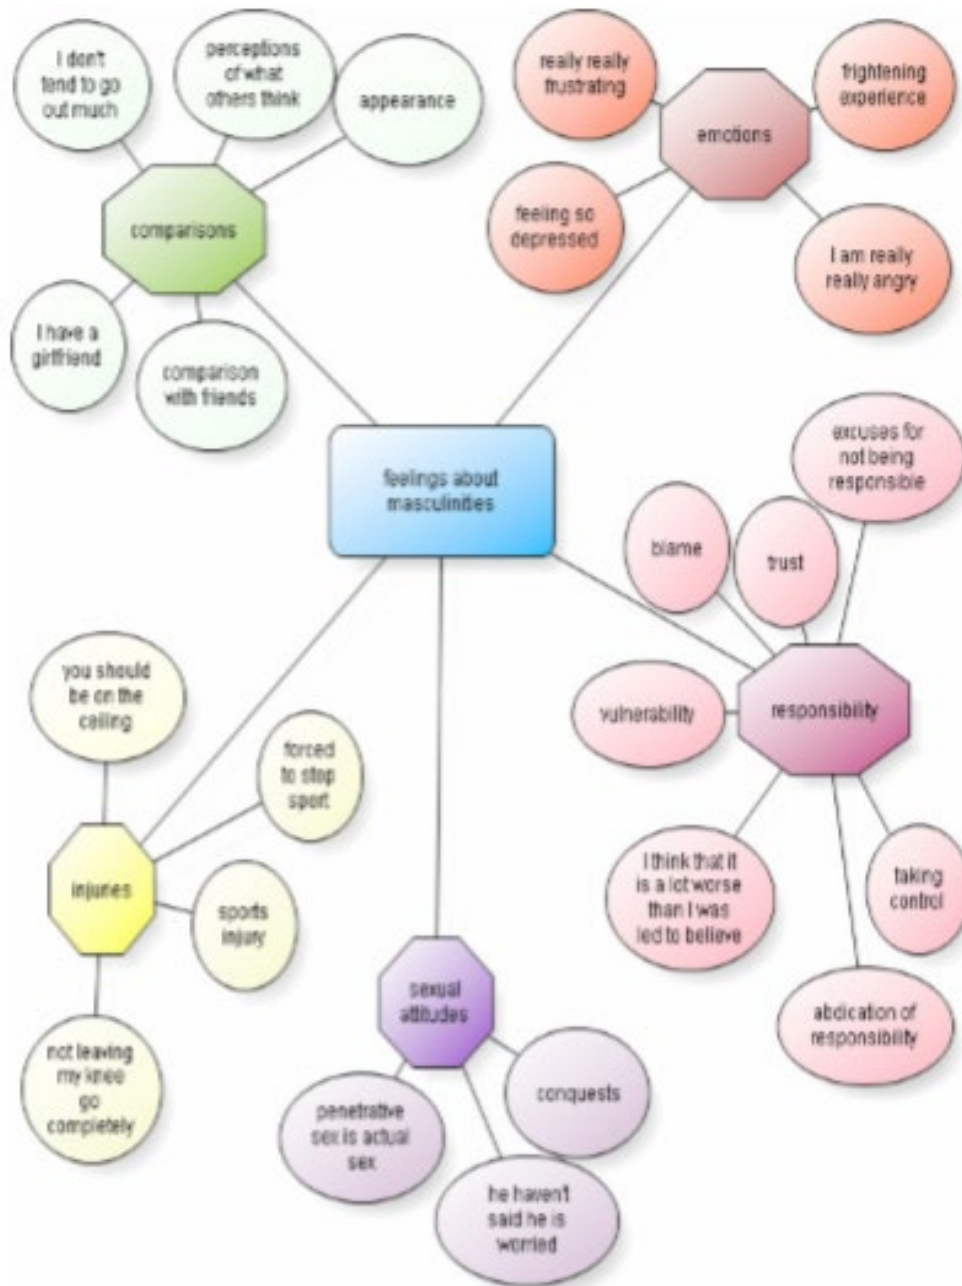

Figure two:  
Feelings  
about  
masculinities

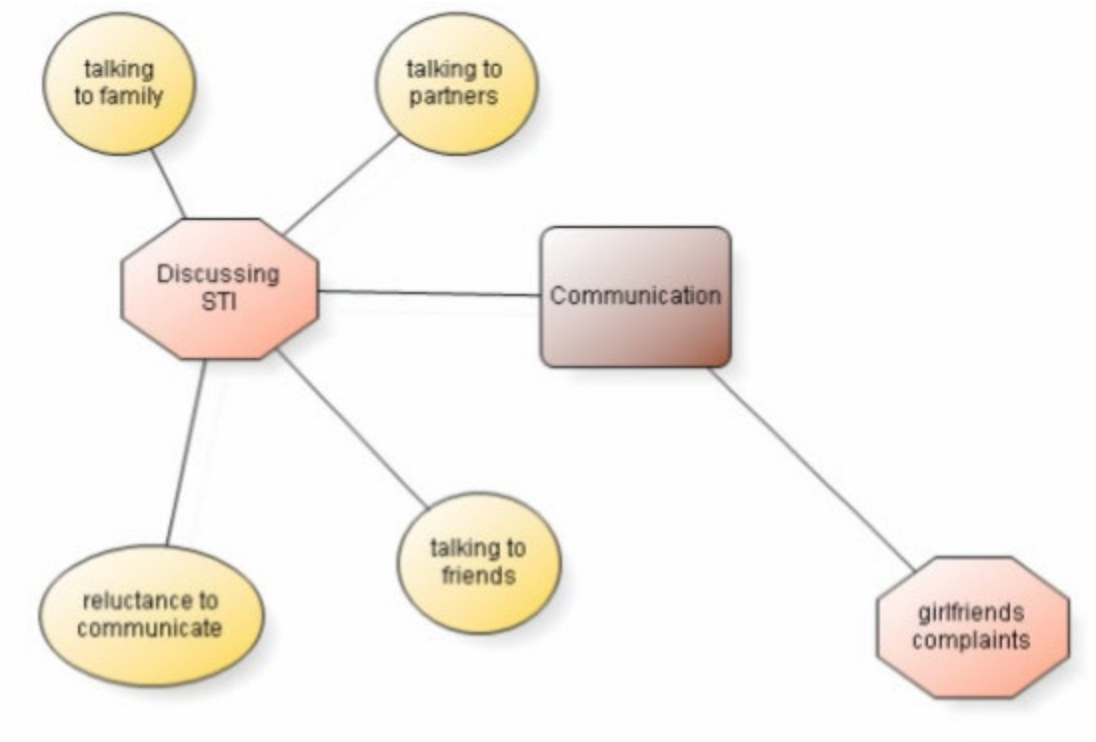

Figure three: Communication

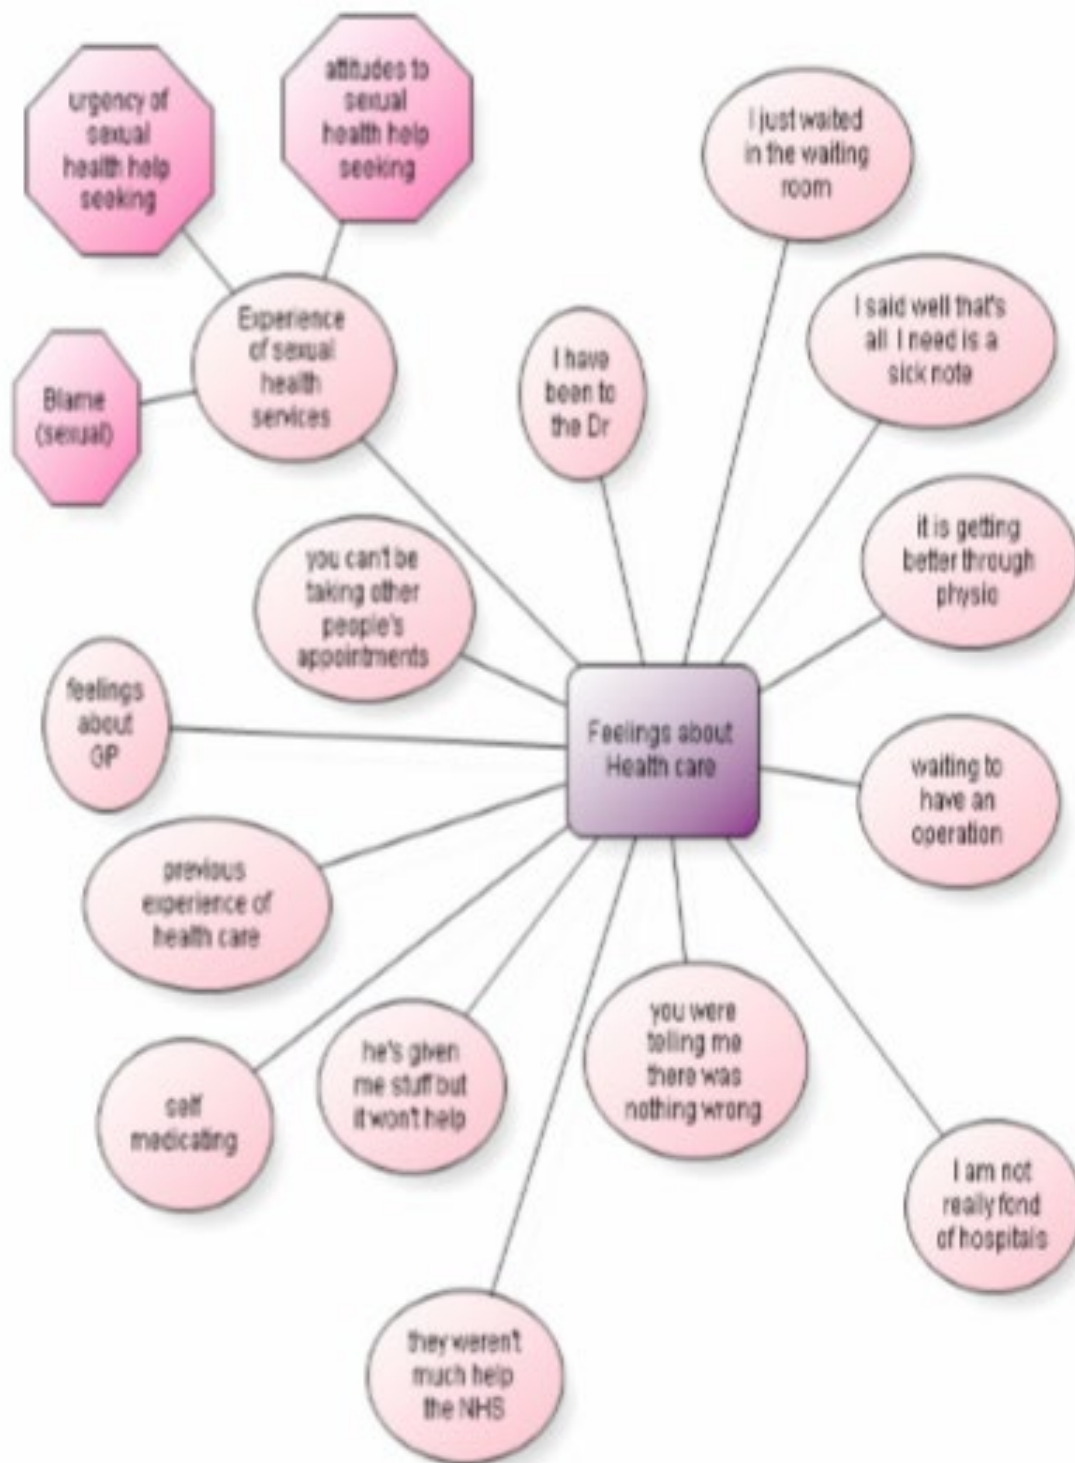

Figure four: Feelings about health care

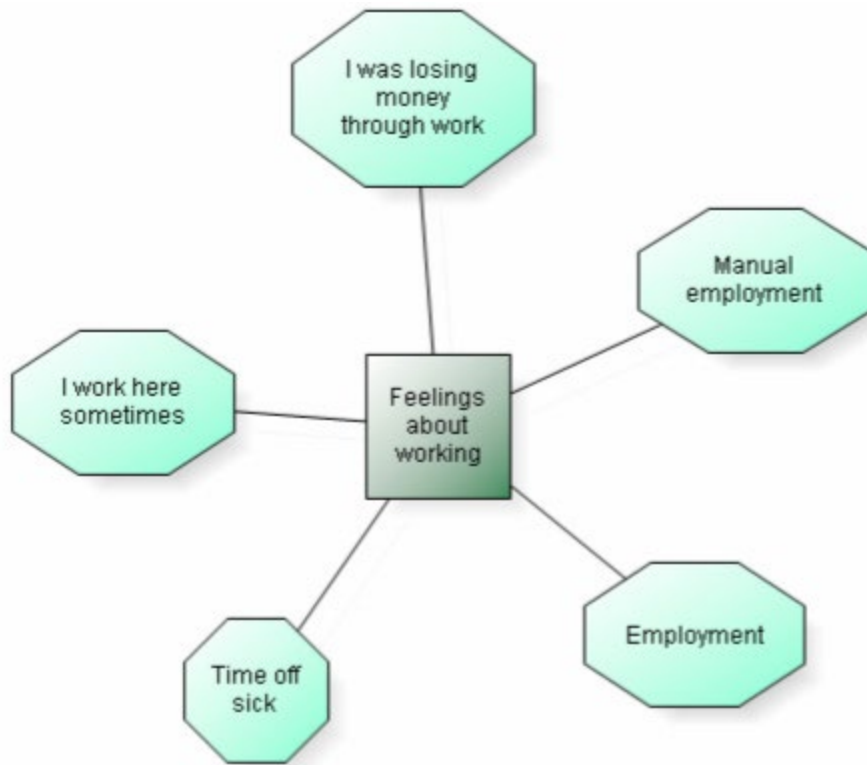

Figure five: Feelings about working

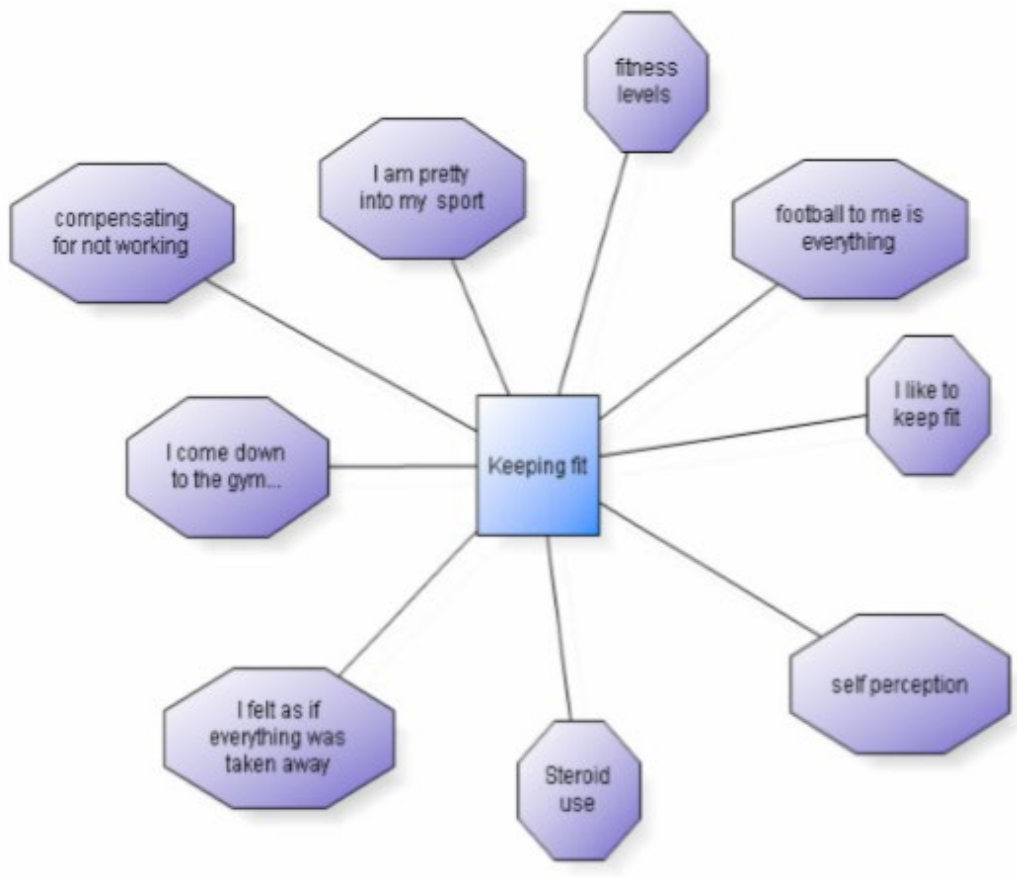

Figure six: Keeping fit
